# Supplementary material for: Immune Checkpoint and EMT-Related Molecules in Circulating Tumor Cells (CTCs) from Triple Negative Breast Cancer Patients and Their Clinical Impact
Source: MDPI journal article supplement (doi:10.3390/cancers15071974), 2023-03-25
Supplement: s1 [file s1]

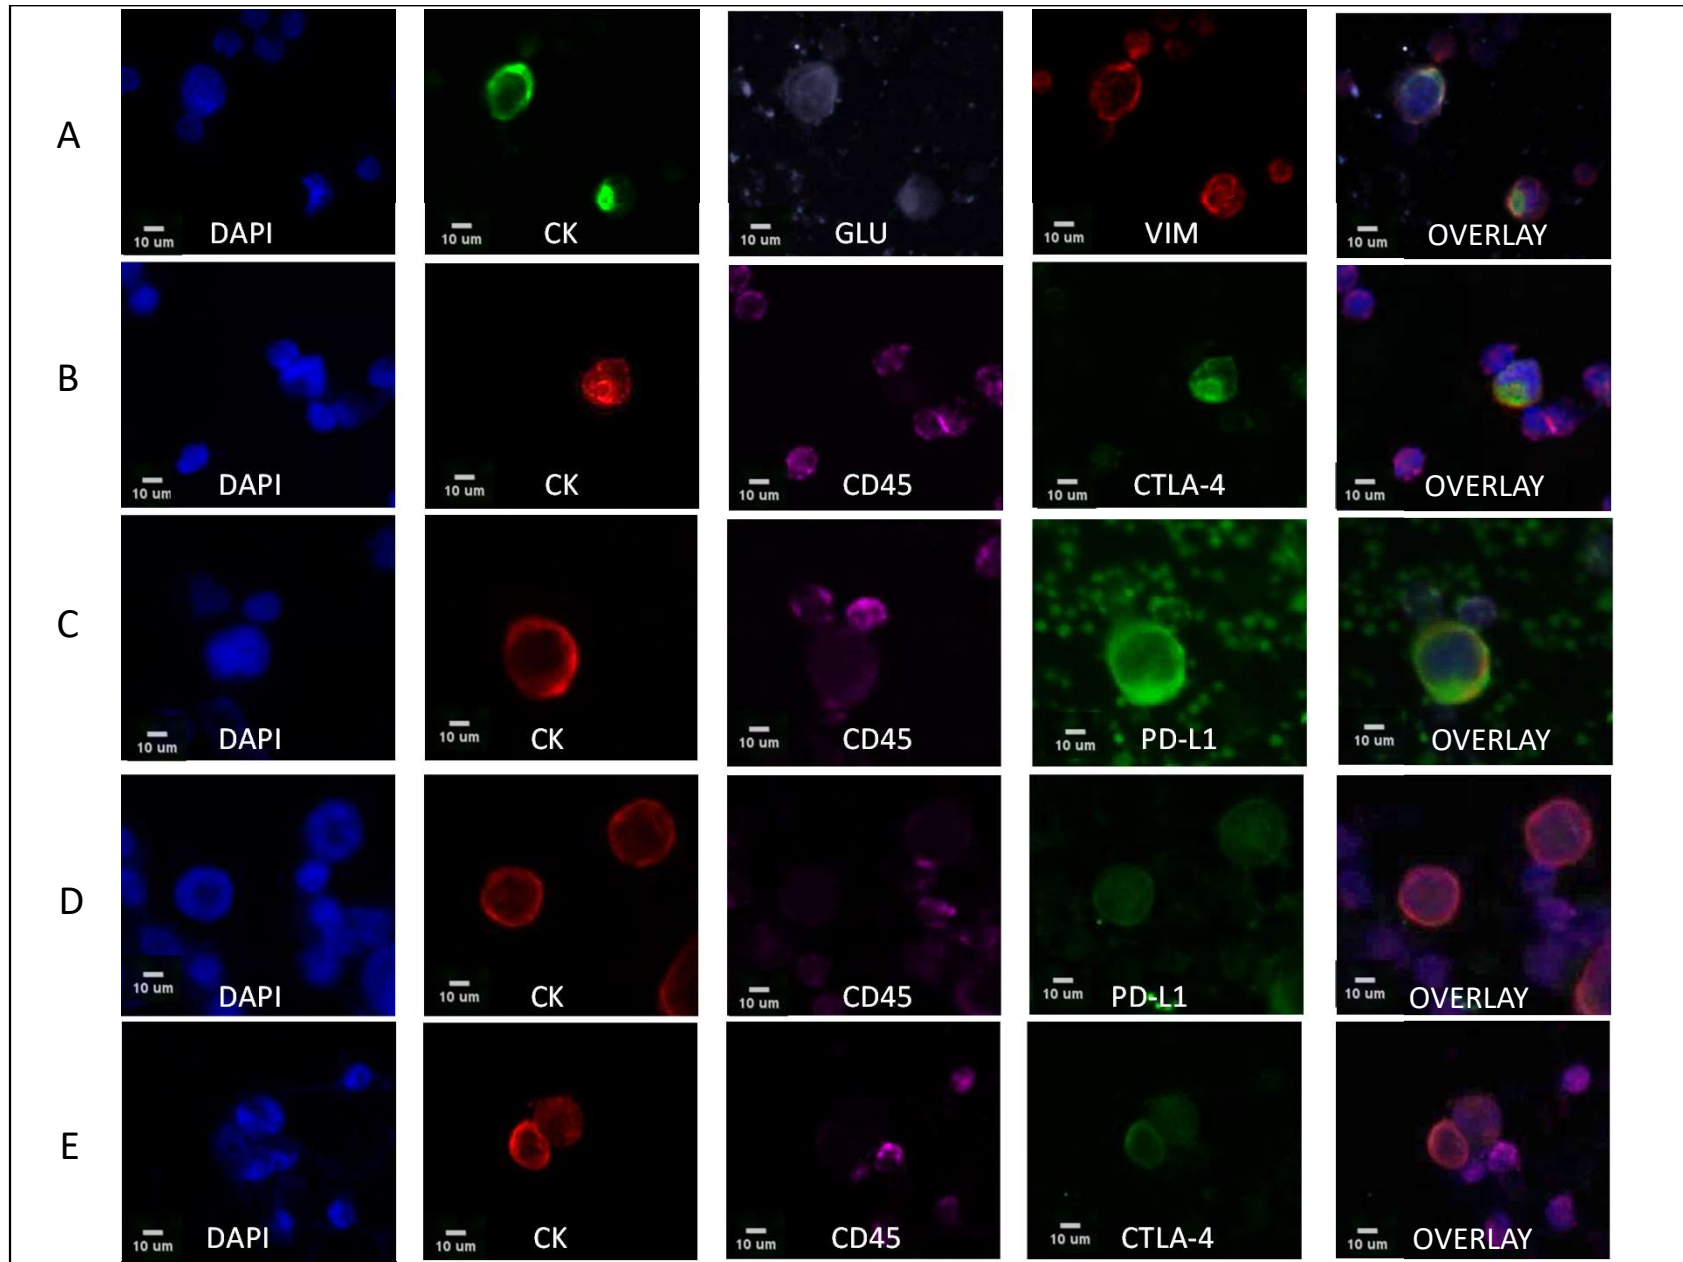

**Figure S1.** Representative micrographs of the positive controls (MDA-MB-231) of (A) CK/CD45/PDL1, (B) CK/CD45/CTLA-4, and (C) CK/GLU/VIM as well as positive controls (MCF-7) of (D) CK/CD45/PDL1 and (E) CK/CD45/CTLA-4 acquired from VyCAP system.

**Table S1.** Statistical analysis and *p* values of all the comparisons between different phenotypes in TNBC and luminal patients.

| Figure | expression        | Test         | <i>p</i> Values |
|--------|-------------------|--------------|-----------------|
| 2b     | PD-L1+            | Chi-square   | 0.569           |
| 2b     | PD-L1-            | Chi-square   | 0.113           |
| 2b     | CTLA-4+           | Chi-square   | 0.025           |
| 2b     | CTLA-4-           | Chi-square   | 0.555           |
| 2d     | PD-L1+            | Mann-Whitney | 0.150           |
| 2d     | PD-L1-            | Mann-Whitney | 0.049           |
| 2d     | CTLA-4+           | Mann-Whitney | 0.024           |
| 2d     | CTLA-4-           | Mann-Whitney | 0.327           |
| 4a     | PD-L1+            | Chi-square   | 0.272           |
| 4a     | PD-L1-            | Chi-square   | 0.790           |
| 4a     | CTLA-4+           | Chi-square   | 0.189           |
| 4a     | CTLA-4-           | Chi-square   | 0.755           |
| 4b     | PD-L1+(early)     | Chi-square   | 0.102           |
| 4b     | PDL1+(metast.)    | Chi-square   | 0.968           |
| 4b     | CTLA-4+ (early)   | Chi-square   | 0.424           |
| 4b     | CTLA-4+ (metast.) | Chi-square   | 0.172           |
| 4c     | PD-L1+            | Mann-Whitney | 0.244           |
| 4c     | PD-L1-            | Mann-Whitney | 0.852           |
| 4c     | CTLA-4+           | Mann-Whitney | 0.223           |
| 4c     | CTLA-4-           | Mann-Whitney | 0.668           |
| 4d     | PD-L1+(early)     | Mann-Whitney | 0.551           |
| 4d     | PDL1+(metast.)    | Mann-Whitney | 0.179           |
| 4d     | CTLA-4+ (early)   | Mann-Whitney | 0.449           |
| 4d     | CTLA-4+ (metast.) | Mann-Whitney | 0.090           |
| 5b     | GLU+VIM+CK+       | Chi-square   | 0.005           |
| 5b     | GLU-VIM+CK+       | Chi-square   | 0.842           |
| 5b     | GLU+VIM-CK+       | Chi-square   | 0.448           |
| 5b     | GLU-VIM-CK+       | Chi-square   | 0.555           |
| 5d     | GLU+VIM+CK+       | Mann-Whitney | 0.020           |
| 5d     | GLU-VIM+CK+       | Mann-Whitney | 0.765           |
| 5d     | GLU+VIM-CK+       | Mann-Whitney | 0.485           |
| 5d     | GLU-VIM-CK+       | Mann-Whitney | 0.604           |

**Table S2.** Total number of CTCs, expressing PD-L1, CTLA-4, GLU and VIM in all TNBC and luminal patients

| PATIENTS | SUBTYPE | PD-L1+ | PD-L1- | CTLA-4+ | CTLA-4- | GLU+ | GLU- | VIM+ | VIM- |
|----------|---------|--------|--------|---------|---------|------|------|------|------|
| 1        | TNBC    | 0      | 0      | 1       | 0       | 2    | 0    | 2    | 0    |
| 2        | TNBC    | 0      | 0      | 0       | 0       | 0    | 0    | 0    | 0    |
| 3        | TNBC    | 1      | 1      | 0       | 0       | 1    | 0    | 5    | 2    |
| 4        | TNBC    | 0      | 0      | 0       | 0       | 0    | 6    | 1    | 5    |
| 5        | TNBC    | 1      | 0      | 1       | 3       | 5    | 13   | 10   | 8    |
| 6        | TNBC    | 0      | 0      | 0       | 0       | 0    | 0    | 0    | 0    |
| 7        | TNBC    | 0      | 0      | 0       | 0       | 4    | 7    | 10   | 1    |
| 8        | TNBC    | 1      | 0      | 0       | 0       | 1    | 0    | 0    | 1    |
| 9        | TNBC    | 1      | 0      | 0       | 0       | 1    | 5    | 0    | 6    |
| 10       | TNBC    | 0      | 0      | 0       | 0       | 0    | 2    | 0    | 2    |
| 11       | TNBC    | 0      | 0      | 0       | 0       | 0    | 0    | 0    | 0    |
| 12       | TNBC    | 0      | 0      | 1       | 0       | 0    | 2    | 2    | 0    |
| 13       | TNBC    | 1      | 0      | 0       | 0       | 1    | 2    | 2    | 1    |
| 14       | TNBC    | 1      | 0      | 1       | 0       | 0    | 0    | 0    | 0    |
| 15       | TNBC    | 1      | 2      | 1       | 0       | 0    | 0    | 0    | 0    |
| 16       | TNBC    | 1      | 0      | 0       | 0       | 12   | 26   | 35   | 3    |
| 17       | TNBC    | 0      | 0      | 0       | 0       | 0    | 0    | 0    | 0    |
| 18       | TNBC    | 0      | 0      | 0       | 0       | 2    | 0    | 1    | 1    |
| 19       | TNBC    | 0      | 2      | 0       | 0       | 0    | 0    | 0    | 0    |
| 20       | TNBC    | 0      | 2      | 0       | 0       | 1    | 1    | 1    | 1    |
| 21       | TNBC    | 1      | 0      | 0       | 1       | 2    | 1    | 2    | 1    |
| 22       | TNBC    | 0      | 0      | 3       | 0       | 1    | 1    | 2    | 0    |
| 23       | TNBC    | 0      | 0      | 1       | 0       | 0    | 1    | 1    | 0    |
| 24       | TNBC    | 1      | 1      | 0       | 1       | 0    | 0    | 0    | 0    |
| 25       | TNBC    | 1      | 0      | 0       | 0       | 0    | 0    | 0    | 0    |
| 26       | TNBC    | 0      | 0      | 0       | 0       | 0    | 1    | 1    | 0    |
| 27       | TNBC    | 1      | 0      | 2       | 2       | 0    | 0    | 0    | 0    |
| 28       | TNBC    | 2      | 0      | 0       | 0       | 0    | 0    | 0    | 0    |
| 29       | TNBC    | 0      | 0      | 0       | 0       | 0    | 0    | 0    | 0    |
| 30       | TNBC    | 0      | 0      | 0       | 0       | 0    | 0    | 0    | 0    |
| 31       | TNBC    | 2      | 0      | 1       | 1       | 2    | 2    | 4    | 0    |
| 32       | TNBC    | 0      | 0      | 0       | 0       | 2    | 13   | 12   | 3    |
| 33       | TNBC    | 1      | 0      | 1       | 0       | 0    | 0    | 0    | 0    |
| 34       | TNBC    | 0      | 1      | 0       | 0       | 0    | 0    | 0    | 0    |
| 35       | TNBC    | 0      | 0      | 0       | 0       | 0    | 5    | 3    | 2    |
| 36       | TNBC    | 0      | 0      | 1       | 0       | 0    | 0    | 0    | 0    |
| 37       | TNBC    | 0      | 0      | 1       | 0       | 2    | 14   | 15   | 1    |
| 38       | TNBC    | 0      | 0      | 0       | 0       | 4    | 4    | 2    | 6    |
| 39       | TNBC    | 0      | 0      | 0       | 0       | 1    | 3    | 4    | 0    |
| 40       | TNBC    | 0      | 0      | 1       | 0       | 1    | 1    | 2    | 0    |
| 41       | TNBC    | 2      | 0      | 1       | 1       | 0    | 1    | 1    | 0    |
| 42       | TNBC    | 1      | 0      | 0       | 0       | 0    | 0    | 0    | 0    |
| 43       | TNBC    | 0      | 0      | 0       | 0       | 1    | 0    | 1    | 0    |
| 44       | TNBC    | 0      | 0      | 0       | 0       | 0    | 0    | 0    | 0    |
| 45       | TNBC    | 0      | 2      | 0       | 0       | 0    | 0    | 0    | 0    |
| 46       | TNBC    | 3      | 3      | 0       | 1       | 0    | 0    | 0    | 0    |
| 47       | TNBC    | 0      | 0      | 0       | 0       | 0    | 2    | 2    | 0    |
| 48       | TNBC    | 0      | 0      | 0       | 0       | 1    | 3    | 4    | 0    |
| 49       | TNBC    | 1      | 1      | 2       | 0       | 0    | 0    | 1    | 0    |
| 50       | TNBC    | 0      | 0      | 0       | 0       | 0    | 0    | 0    | 0    |
| 51       | TNBC    | 1      | 0      | 1       | 2       | 0    | 0    | 0    | 0    |
| 52       | TNBC    | 2      | 0      | 1       | 1       | 3    | 2    | 3    | 2    |
| 53       | TNBC    | 0      | 0      | 1       | 0       | 0    | 1    | 1    | 0    |
| 54       | TNBC    | 1      | 0      | 1       | 0       | 1    | 1    | 2    | 0    |
| 55       | TNBC    | 1      | 0      | 6       | 2       | 1    | 0    | 1    | 0    |
| 56       | TNBC    | 1      | 0      | 2       | 0       | 0    | 0    | 0    | 0    |
| 57       | TNBC    | 0      | 0      | 0       | 0       | 0    | 1    | 1    | 0    |
| 58       | TNBC    | 0      | 0      | 1       | 0       | 0    | 1    | 1    | 0    |
| 59       | TNBC    | 3      | 0      | 0       | 0       | 1    | 0    | 0    | 1    |
| 60       | TNBC    | 0      | 0      | 1       | 0       | 0    | 0    | 0    | 0    |
| 61       | TNBC    | 1      | 0      | 0       | 0       | 0    | 1    | 1    | 0    |
| 62       | TNBC    | 0      | 0      | 0       | 0       | 0    | 0    | 0    | 0    |
| 63       | TNBC    | 0      | 0      | 0       | 1       | 2    | 0    | 2    | 0    |
| 64       | TNBC    | 0      | 0      | 0       | 1       | 0    | 0    | 0    | 0    |
| 65       | LUMINAL | 1      | 0      | 0       | 0       | ND   | ND   | ND   | ND   |
| 66       | LUMINAL | 0      | 0      | 0       | 0       | ND   | ND   | ND   | ND   |
| 67       | LUMINAL | 0      | 1      | 0       | 1       | ND   | ND   | ND   | ND   |
| 68       | LUMINAL | 0      | 0      | 0       | 0       | ND   | ND   | ND   | ND   |
| 69       | LUMINAL | 1      | 0      | 1       | 0       | ND   | ND   | ND   | ND   |
| 70       | LUMINAL | 0      | 0      | 0       | 0       | ND   | ND   | ND   | ND   |
| 71       | LUMINAL | 1      | 1      | 0       | 0       | ND   | ND   | ND   | ND   |
| 72       | LUMINAL | 0      | 0      | 0       | 0       | ND   | ND   | ND   | ND   |
| 73       | LUMINAL | 0      | 0      | 0       | 1       | ND   | ND   | ND   | ND   |
| 74       | LUMINAL | 1      | 0      | 0       | 0       | ND   | ND   | ND   | ND   |
| 75       | LUMINAL | 0      | 1      | 0       | 0       | ND   | ND   | ND   | ND   |
| 76       | LUMINAL | 1      | 0      | 0       | 1       | ND   | ND   | ND   | ND   |
| 77       | LUMINAL | 0      | 1      | 0       | 1       | ND   | ND   | ND   | ND   |
| 78       | LUMINAL | 1      | 0      | 0       | 0       | ND   | ND   | ND   | ND   |
| 79       | LUMINAL | 0      | 0      | 0       | 0       | ND   | ND   | ND   | ND   |
| 80       | LUMINAL | 1      | 0      | 0       | 0       | ND   | ND   | ND   | ND   |
| 81       | LUMINAL | 0      | 3      | 0       | 0       | ND   | ND   | ND   | ND   |
| 82       | LUMINAL | 0      | 0      | 0       | 0       | ND   | ND   | ND   | ND   |
| 83       | LUMINAL | 2      | 0      | 2       | 0       | ND   | ND   | ND   | ND   |
| 84       | LUMINAL | 0      | 0      | 1       | 0       | ND   | ND   | ND   | ND   |
| 85       | LUMINAL | 0      | 0      | 0       | 0       | ND   | ND   | ND   | ND   |
| 86       | LUMINAL | 0      | 0      | 2       | 0       | ND   | ND   | ND   | ND   |
| 87       | LUMINAL | 0      | 0      | 1       | 0       | ND   | ND   | ND   | ND   |
| 88       | LUMINAL | 0      | 0      | 0       | 0       | ND   | ND   | ND   | ND   |
| 89       | LUMINAL | 0      | 0      | 0       | 0       | ND   | ND   | ND   | ND   |
| 90       | LUMINAL | 0      | 0      | 2       | 0       | ND   | ND   | ND   | ND   |
| 91       | LUMINAL | 0      | 0      | 0       | 0       | ND   | ND   | ND   | ND   |
| 92       | LUMINAL | 0      | 0      | 0       | 0       | ND   | ND   | ND   | ND   |
| 93       | LUMINAL | 0      | 0      | 0       | 0       | ND   | ND   | ND   | ND   |
| 94       | LUMINAL | 0      | 0      | 0       | 0       | ND   | ND   | ND   | ND   |
| 95       | LUMINAL | 2      | 0      | 1       | 1       | ND   | ND   | ND   | ND   |
